# Supplementary material
Source: PubMed Central journal article supplement (PMC5597430)
Supplement: NIHMS6828-supplement-Supplementary_Appendix.pdf [file NIHMS6828-supplement-Supplementary_Appendix.pdf]

# THE LANCET

## Supplementary appendix

This appendix formed part of the original submission and has been peer reviewed. We post it as supplied by the authors.

Supplement to: Fixation using Alternative Implants for the Treatment of Hip fractures (FAITH) Investigators. Fracture fixation in the operative management of hip fractures (FAITH): an international, multicentre, randomised controlled trial. *Lancet* 2017; published online March 2. [http://dx.doi.org/10.1016/S0140-6736\(17\)30066-1](http://dx.doi.org/10.1016/S0140-6736(17)30066-1).

**SUPPLEMENTARY DOCUMENTS**

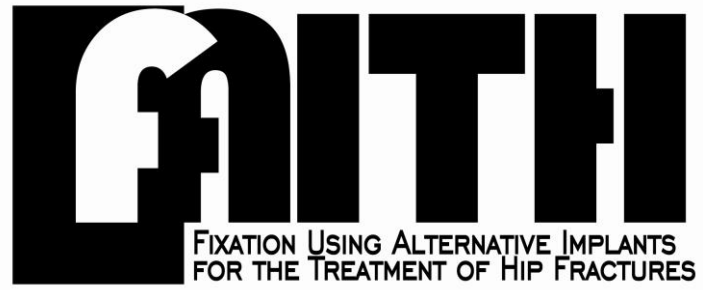

**Prepared on: January 19, 2017**

## Supplementary Document Table of Contents

|                                                                                              |    |
|----------------------------------------------------------------------------------------------|----|
| 1.0 FAITH INVESTIGATORS .....                                                                | 3  |
| Writing Committee.....                                                                       | 3  |
| Steering Committee.....                                                                      | 3  |
| Global Methods Centre .....                                                                  | 3  |
| United States Methods Centre.....                                                            | 3  |
| Netherlands Method Centre.....                                                               | 3  |
| United Kingdom Method Centre.....                                                            | 3  |
| Adjudication Committee .....                                                                 | 3  |
| Participating Clinical Sites .....                                                           | 3  |
| Canada .....                                                                                 | 3  |
| United States.....                                                                           | 4  |
| The Netherlands.....                                                                         | 5  |
| International.....                                                                           | 5  |
| 2.0 FUNDING SOURCES .....                                                                    | 6  |
| 3.0 SUPPLEMENTAL APPENDICES .....                                                            | 7  |
| 3.1 Eligibility Criteria .....                                                               | 7  |
| 3.2 Trial Interventions and Standardization of Peri-Operative Care .....                     | 7  |
| 3.3 Threshold Performance for Internal Fixation.....                                         | 8  |
| 3.4 Follow-up Processes.....                                                                 | 9  |
| 3.5 Outcome Definitions .....                                                                | 9  |
| 3.6 Overview of Adjudication.....                                                            | 9  |
| 3.7 Sample Size Calculations .....                                                           | 10 |
| 3.8 Subgroup Analyses and Hypothesized Effects.....                                          | 11 |
| 3.9 Rationale for Excluding Ineligible Patients from Analyses .....                          | 11 |
| 4.0 SUPPLEMENTARY TABLES .....                                                               | 12 |
| Table S1a: Reasons for Exclusion by Clinical Sites.....                                      | 12 |
| Table S1b: Reasons for Exclusion by the Adjudication Committee .....                         | 13 |
| Table S2: Surgical and Peri-Operative Management .....                                       | 14 |
| Table S3: Cancellous Screw Surgical Management.....                                          | 15 |
| Table S4: Sliding Hip Screw Surgical Management.....                                         | 16 |
| Table S5: Study Outcomes by Treatment Group for Undisplaced Fractures .....                  | 17 |
| Table S6: Health-Related Quality of Life by Treatment Groups for Undisplaced Fractures ..... | 18 |
| Table S7: Study Outcomes by Treatment Group for Displaced Fractures .....                    | 19 |
| Table S8: Health-Related Quality of Life by Treatment Groups For Displacement .....          | 20 |
| Table S9: Interaction Between Secondary Outcomes and Smoker Status.....                      | 21 |

## 1.0 FAITH INVESTIGATORS

**Writing Committee:** Mohit Bhandari (Chair, McMaster University), PJ Devereaux (McMaster University), Gordon Guyatt (McMaster University), Lehana Thabane (McMaster University), Stephen D. Walter (McMaster University), Martin J. Heetveld (Spaarne Gasthuis, Haarlem), Kyle J. Jeray (Greenville Health System), Susan Liew (The Alfred), Emil H. Schemitsch (University of Western Ontario), Paul Tornetta III (Boston University Medical Center), Gregory J. Della Rocca (Duke University), Richard E. Buckley (Foothills Medical Centre), Robert McCormack (Royal Columbian Hospital/Fraser Health Authority/University of British Columbia), Todd M. Oliver (Boone Hospital Center – Columbia Orthopaedic Group), Michiel J.M. Segers (St. Antonius Ziekenhuis), Amar Rangan (The James Cook University Hospital), Martin Richardson (University of Melbourne), Sheila Sprague (McMaster University), Gerard P. Slobogean (University of Maryland, Baltimore), Taryn Scott (McMaster University), Julie Agel (University of Minnesota), Alisha Garibaldi (McMaster University), Qi Zhou (McMaster University), Diane Heels-Ansdell (McMaster University), Helena Viveiros (McMaster University), Stephanie M. Zielinski (Erasmus MC, University Medical Center Rotterdam), Esther M.M. Van Lieshout (Erasmus MC, University Medical Center Rotterdam), Herman Johal (McMaster University), Birgit C. Hanusch (The James Cook University Hospital), and Marc Swiontkowski (Co-Chair, University of Minnesota)

**Steering Committee:** Mohit Bhandari (Chair, McMaster University), Marc Swiontkowski (University of Minnesota), PJ Devereaux (McMaster University), Gordon Guyatt (McMaster University), Martin J. Heetveld (Spaarne Gasthuis, Haarlem), Kyle Jeray (Greenville Health System), Susan Liew (The Alfred), Martin Richardson (University of Melbourne), Emil H. Schemitsch (University of Western Ontario), Lehana Thabane (McMaster University), Paul Tornetta III (Boston University Medical Center), and Stephen D. Walter (McMaster University)

**Global Methods Centre:** Mohit Bhandari (Principal Investigator); Sheila Sprague (Research Methodologist); Paula McKay (Manager); Taryn Scott, Alisha Garibaldi, Helena Viveiros, Marilyn Swinton, (Research Coordination); Mark Gichuru, Sofia Bzovsky (Adjudication Coordination); Diane Heels-Ansdell, Qi Zhou (Statistical Analysis); Lisa Buckingham, Aravin Duraikannan (Data Management); Deborah Maddock, Nicole Simunovic (Grants Management) (McMaster University)

**United States Methods Centre:** Marc Swiontkowski (Principal Investigator); Julie Agel (Research Coordination) (University of Minnesota)

**Netherlands Method Centre:** Martin J. Heetveld (Principal Investigator); Esther M.M. Van Lieshout (Research Coordination); Stephanie M. Zielinski (Trial Coordination) (Erasmus MC, University Medical Center Rotterdam)

**United Kingdom Method Centre:** Amar Rangan (Principal Investigator), Birgit C. Hanusch, Lucksy Kottam, Rachel Clarkson (Research Coordination) (The James Cook University Hospital)

**Adjudication Committee:** Gregory J. Della Rocca (Chair) (Duke University), Robert Haverlag (Onze Lieve Vrouwe Gasthuis), Susan Liew (The Alfred), Gerard P. Slobogean (University of Maryland, Baltimore), Kyle Jeray (Greenville Health System)

### Participating Clinical Sites:

#### *Canada:*

Robert McCormack, Kelly Apostle, Dory Boyer, Farhad Moola, Bertrand Perey, Trevor Stone, Darius Viskontas, H. Michael Lemke, Mauri Zomar, Karyn Moon, Raeli Moon, Amber Oatt (**Royal Columbian Hospital / Fraser Health Authority / University of British Columbia**); Richard E. Buckley, Paul Duffy, Robert Korley, Shannon Puloski, James Powell, Kelly Johnston, Kimberly Carcary, Melissa Lorenzo, Ross McKercher (**Foothills Medical Centre**); David Sanders, Mark MacLeod, Abdel-Rahman Lawendy, Christina Tieszer (**London Health Sciences Centre**); David Stephen, Hans Kreder, Richard Jenkinson, Markku Nousiainen, Terry Axelrod, John Murnaghan, Diane Nam, Veronica Wadey, Albert Yee, Katrine Milner, Monica Kunz, Wesley Ghent (**Sunnybrook Health Sciences Centre**); Emil H. Schemitsch, Michael D. McKee, Jeremy A. Hall, Aaron Nauth, Henry Ahn, Daniel B. Whelan, Milena R. Vicente, Lisa M. Wild, Ryan M. Khan, Jennifer T. Hidy (**St. Michael's Hospital**); Chad Coles, Ross Leighton, Michael Biddulph, David Johnston, Mark Glazebrook, David Alexander, Catherine Coady, Michael Dunbar, J. David Amirault, Michael Gross, William Oxner, Gerald Reardon, C. Glen Richardson, J. Andrew Trenholm, Ivan Wong, Kelly Trask, Shelley MacDonald, Gwendolyn Dobbin (**Queen Elizabeth II Health Sciences**

**Centre**); Ryan Bicknell, Jeff Yach, Davide Bardana, Gavin Wood, Mark Harrison, David Yen, Sue Lambert, Fiona Howells, Angela Ward (**Human Mobility Research Centre, Queen’s University and Kingston General Hospital**); Paul Zalzal, Heather Brien, V. Naumetz, Brad Weening, Nicole Simunovic (**Oakville Trafalgar Memorial Hospital**); Eugene K. Wai, Steve Papp, Wade T. Gofton, Allen Liew, Stephen P. Kingwell, Garth Johnson, Joseph O’Neil, Darren M. Roffey, Vivian Borsella (**The Ottawa Hospital**); Victoria Avram (**Juravinski Hospital and Cancer Centre**)

*United States:*

Todd M. Oliver, Vicki Jones, Michelle Vogt (**Boone Hospital Center – Columbia Orthopaedic Group**); Clifford B. Jones, James R. Ringler, Terrence J. Endres, Debra L. Sietsema, Jane E. Walker (**Orthopaedic Associates of Michigan**); Kyle J. Jeray, J. Scott Broderick, David R. Goetz, Thomas B. Pace, Thomas M. Schaller, Scott E. Porter, Michael L. Beckish, John D. Adams, Benjamin B. Barden, Aaron T. Creek, Stephen H. Finley, Jonathan L. Foret, Garland K. Gudger Jr, Richard W. Gurich Jr, Austin D. Hill, Steven M. Hollenbeck, Lyle T. Jackson, Kevin K. Kruse, III, Wesley G. Lackey, Justin W. Langan, Julia Lee, Lauren C. Leffler, Timothy J. Miller, R. Lee Murphy, Jr., Lawrence K. O’Malley II, Melissa E. Peters, Dustin M. Price, John A. Tanksley, Jr., Erick T. Torres, Dylan J. Watson, Scott T. Watson, Stephanie L. Tanner, Rebecca G. Snider, Lauren A. Nastoff, Shea A. Bielby, Robert J. Teasdall (**Greenville Health System**); Julie A. Switzer, Peter A. Cole, Sarah A. Anderson, Paul M. Lafferty, Mengnai Li, Thuan V. Ly, Scott B. Marston, Amy L. Foley, Sandy Vang, David M. Wright (**Regions Hospital-University of Minnesota**); Andrew J. Marcantonio, Michael S.H. Kain, Richard Iorio, Lawrence M. Specht, John F. Tilzey, Margaret J. Lobo, John S. Garfi (**Lahey Hospital & Medical Center**); Heather A. Vallier, Andrea Dolenc, Mary Breslin (**MetroHealth Medical Center**); Michael J. Prayson, Richard Laughlin, L. Joseph Rubino, Jedediah May, Geoffrey Ryan Rieser, Liz Dulaney-Cripe, Chris Gayton (**Miami Valley Hospital**); James Shaer, Tyson Schrickel, Barbara Hileman (**St. Elizabeth Youngstown Hospital**); John T. Gorczyca, Jonathan M. Gross, Catherine A. Humphrey, Stephen Kates, John P. Ketz, Krista Noble, Allison W. McIntyre, Kaili Pecorella (**University of Rochester Medical Center**); Craig A. Davis, Stuart Weinerman, Peter Weingarten, Philip Stull, Stephen Lindenbaum, Michael Hewitt, John Schwappach, Janell K. Baker, Tori Rutherford, Heike Newman, Shane Lieberman, Erin Finn, Kristin Robbins, Meghan Hurley, Lindsey Lyle, Khalis Mitchell, Kieran Browner, Erica Whatley, Krystal Payton, Christina Reeves (**Colorado Orthopedic Consultants**); Lisa K. Cannada, David E. Karges, Sarah A. Dawson (**St. Louis University Hospital**); Samir Mehta, John Esterhai, Jaimo Ahn, Derek Donegan, Annamarie D. Horan, Patrick J. Heskeith, Evan R. Bannister (**University of Pennsylvania**); Jonathan P. Keeve, Christopher G. Anderson, Michael D. McDonald, Jodi M. Hoffman (**Northwest Orthopaedic Specialists**); Ivan Tarkin, Peter Siska, Gary Gruen, Andrew Evans, Dana J. Farrell, James Irrgang, Arlene Luther (**University of Pittsburgh Medical Center**); William W. Cross III, Joseph R. Cass, Stephen A. Sems, Michael E. Torchia, Tyson Scrabeck (**Mayo Clinic**); Mark Jenkins, Jules Dumais, Amanda W. Romero (**Texas Tech University Health Sciences Center – Lubbock**); Carlos A. Sagebien, Mark S. Butler, James T. Monica, Patricia Seuffert (**University Orthopaedic Associates, LLC**); Joseph R. Hsu, Daniel Stinner, James Ficke, Michael Charlton, Matthew Napierala, Mary Fan (**US Army Institute of Surgical Research**); Paul Tornetta III, Chadi Tannoury, Hope Carlisle, Heather Silva (**Boston University Medical Center**); Michael Archdeacon, Ryan Finnan, Toan Le, John Wyrick, Shelley Hess (**UC Health/University of Cincinnati Medical Center**); Michael L. Brennan, Robert Probe, Evelyn Kile, Kelli Mills, Lydia Clipper, Michelle Yu, Katie Erwin (**Scott and White Memorial Hospital**); Daniel Horwitz, Kent Strohecker, Teresa K. Swenson (**Geisinger Medical Center**); Andrew H. Schmidt, Jerald R. Westberg (**Hennepin County Medical Center**); Kamran Aurang, Gary Zohman, Brett Peterson, Roger B. Huff (**Kaiser Permanente**); Joseph Baele, Timothy Weber, Matt Edison (**OrthoIndy Trauma St. Vincent Trauma Center**); Jessica Cooper McBeth (**Santa Clara Valley Medical Center**); Karl Shively, Janos P. Ertl, Brian Mullis, J. Andrew Parr, Ripley Worman, Valda Frizzell, Molly M. Moore (**Indiana University – Eskenazi Health Services**); Charles J. DePaolo, Rachel Alosky, Leslie E. Shell, Lynne Hampton, Stephanie Shepard, Tracy Nanney, Claudine Cuento (**Mission Hospital Research Institute**); Robert V. Cantu, Eric R. Henderson, Linda S. Eickhoff (**Dartmouth-Hitchcock Medical Center**); E. Mark Hammerberg, Philip Stahel, David Hak, Cyril Mauffrey, Corey Henderson, Hannah Gissel, Douglas Gibula (**Denver Health and Hospital Authority**); David P. Zamorano, Martin C. Tynan, Deeba Pourmand, Deanna Lawson (**University of California Irvine Medical Center**); Gregory J. Della Rocca, Brett D. Crist, Yvonne M. Murtha, Linda K. Anderson (**University of Missouri Health Care**); Colleen Linehan, Lindsey Pilling (**Covenant Healthcare of Saginaw**); Courtland G. Lewis, Stephanie Caminiti, Raymond J. Sullivan, Elizabeth Roper (**Hartford Hospital**); William Obremsky, Philip Kregor, Justin E. Richards, Kenya Stringfellow (**Vanderbilt University Medical Center**); Michael P. Dohm, Abby Zellar (**Western Slope Study Group**)

*The Netherlands:*

Michiel J.M. Segers, Jacco A.C. Zijl, Bart Verhoeven, Anke B. Smits, Jean Paul P.M. de Vries, Bram Fioole, Henk van der Hoeven, Evert B.M. Theunissen, Tammo S. de Vries Reilingh, Lonke Govaert, Philippe Wittich, Maurits de Brauw, Jan Wille, Peter M.N.Y.M. Go, Ewan D. Ritchie, Ronald N. Wessel, Eric R. Hammacher (**St. Antonius Ziekenhuis**); Martin J. Heetveld, Gijs A. Visser, Heyn Stockmann, Rob Silvis, Jaap P. Snellen, Bram Rijbroek, Joris J.G. Scheepers, Erik G.J. Vermeulen, Michiel P.C. Siroen, Ronald Vuylsteke, Hans L.F. Brom, Herman Rijna (**Kennemer Gasthuis**); Piet A.R. de Rijcke, Cees L. Koppert, Steven E. Buijk, Richard P.R. Groenendijk, Imro Dawson, Geert W.M. Tetteroo, Milko M.M. Bruijninx, Pascal G. Doornebosch, Eelco J.R. de Graaf (**IJsselland Ziekenhuis**); Maarten van der Elst, Carmen C. van der Pol, Martijne van 't Riet, Tom M. Karsten, Mark R. de Vries, Laurents P.S. Stassen, Niels W.L. Schep, G. Ben Schmidt, W.H. Hoffman (**Reinier de Graaf Gasthuis**); Rudolf W. Poolman, Maarten P. Simons, Frank H.W.M. van der Heijden, W. Jaap Willems, Frank R.A.J. de Meulemeester, Cor P. van der Hart, Kahn Turckan, Sebastiaan Festen, Frank de Nies, Robert Haverlag, Nico J.M. Out, Jan Bosma (**Onze Lieve Vrouwe Gasthuis**); Albert van Kampen, Jan Biert, Arie B. van Vugt, Michael J.R. Edwards, Taco J. Blokhuis, Jan Paul M. Frölke, Leo M.G. Geeraedts, Jean W.M. Gardeniers, Edward T.C.H. Tan, Lodewijk M.S.J. Poelhekke, Maarten C. de Waal Malefijt, Bart Schreurs (**University Medical Center St. Radboud**); Gert R. Roukema, Hong A. Josaputra, Paul Keller, Peter D. de Rooij, Hans Kuiken, Han Boxma, Berry I. Cleffken, Ronald Liem (**Maasstad Ziekenhuis**); Steven J. Rhemrev, Coks H.R. Bosman, Alexander de Mol van Otterloo, Jochem Hoogendoorn, Alexander C. de Vries, Sven A.G. Meylaerts (**Medisch Centrum Haaglanden**); Michiel H.J. Verhofstad, Joost Meijer, Teun van Egmond, Frank H.W.M. van der Heijden, Igor van der Brand (**St. Elisabeth Ziekenhuis**); Peter Patka, Martin G. Eversdijk, Rolf Peters, Dennis Den Hartog, Oscar J.F. Van Waes, Pim Oprel (**Erasmus MC, University Medical Center Rotterdam**); Harm M van der Vis, Martin Campo, Ronald Verhagen, G.H. Robert Albers, Arthur W. Zurcher (**Tergooi Ziekenhuizen**); Rogier K.J. Simmermacher, Jeroen van Mulken, Karlijn van Wessem, Taco J. Blokhuis, Steven M. van Gaalen, Luke P.H. Leenen (**University Medical Center Utrecht**); Maarten W.G.A. Bronkhorst, Onno R. Guicherit (**Bronovo Ziekenhuis**); J. Carel Goslings, Robert Haverlag, Kees Jan Ponsen (**Academic Medical Center**)

*International:*

Mahesh Bhatia, Vinod Arora, Vivek Tyagi (**RLB Hospital and Research Centre, India**); Susan Liew, Harvinder Bedi, Ashley Carr, Hamish Curry, Andrew Chia, Steve Csongvay, Craig Donohue, Stephen Doig, Elton Edwards, Greg Etherington, Max Esser, Andrew Gong, Arvind Jain, Doug Li, Russell Miller, Ash Moaveni, Matthias Russ, Lu Ton, Otis Wang, Adam Dowrick, Zoe Murdoch, Claire Sage (**The Alfred, Australia**); Frede Frihagen, John Clarke-Jenssen, Geir Hjorthaug, Torben Ianssen, Asgeir Amundsen, Jan Egil Brattgjerd, Tor Borch, Berthe Bøe, Bernhard Flatøy, Sondre Hasselund, Knut Jørgen Haug, Kim Hemlock, Tor Magne Hoseth, Geir Jomaas, Thomas Kibsgård, Tarjei Lona, Gilbert Moatshe, Oliver Müller, Marius Molund, Tor Nicolaisen, Fredrik Nilsen, Jonas Rydinge, Morten Smedsrud, Are Stødle, Axel Trommer, Stein Ugland, Anders Karlsten, Guri Ekås, Elise Berg Vesterhus, Anne Christine Brekke (**Oslo University Hospital, Norway**); Ajay Gupta, Neeraj Jain, Farah Khan (**Nirmal Hospital, India**); Ateet Sharma, Amir Sanghavi, Mittal Trivedi (**Satellite Orthopaedic Hospital and Research Centre, India**); Anil Rai, Subash, Kamal Rai (**Highway Hospital, India**); Vineet Yadav, Sanjay Singh, Kamal Rai (**Popular Hospital, India**); Kevin Tetsworth, Geoff Donald, Patrick Weinrauch, Paul Pincus, Steven Yang, Brett Halliday, Trevor Gervais, Michael Holt, Annette Flynn (**Royal Brisbane and Women's Hospital, Australia**); Amal Shankar Prasad, Vimlesh Mishra (**Madhuraj Nursing Home, India**); D.C. Sundaresh, Angshuman Khanna (**M.S. Rammaiah Medical College & Hospital, India**); Joe Joseph Cherian, Davy J Olakkengil, Gaurav Sharma (**St John's Medical College Hospital, India**); Marinis Pirpiris, David Love, Andrew Bucknill, Richard J Farrugia (**Royal Melbourne Hospital, Australia**); Hans-Christoph Pape, Matthias Knobe, Roman Pfeifer (**University of Aachen Medical Center, Germany**); Peter Hull, Sophie Lewis, Simone Evans (**Cambridge University Hospitals, England**); Rajesh Nanda, Rajanikanth Logishetty, Sanjeev Anand, Carol Bowler (**University Hospital of North Tees, England**); Akhil Dadi, Naveen Palla, Utsav Ganguly (**Sunshine Hospital, India**); B. Sachidananda Rai, Janakiraman Rajakumar (**Unity Health Complex, India**); Andrew Jennings, Graham Chuter, Glynis Rose, Gillian Horner (**University Hospital of North Durham and Darlington Memorial Hospital, England**); Callum Clark, Kate Eke (**Wexham Park Hospital, England**); Mike Reed, Dominic Inman, Chris Herriott, Christine Dobb (**Northumbria Healthcare NHS Foundation Trust, England**)

## **2.0 FUNDING SOURCES**

Supported by research grants from the Canadian Institutes of Health Research (MOP-106630 and MCT-87771), National Institutes of Health (1R01AR055267-01A1), Stichting NutsOhra (SNO-T-0602-43), the Netherlands Organisation for Health Research and Development (80-82310-97-11032), Physicians' Services Incorporated. Dr. Bhandari was also funded, in part, through the Early Research Award Program which provided funding for the present study as well as by a Canada Research Chair in Musculoskeletal Trauma which is unrelated to the present study (McMaster University, Hamilton, ON, Canada).

Research reported in this publication was supported by the National Institute of Arthritis and Musculoskeletal and Skin Diseases of the National Institutes of Health under Award Number R01AR055267-01A1. The content is solely the responsibility of the authors and does not necessarily represent the official views of the National Institutes of Health. Research reported in this publication was also supported by The County Durham & Tees Valley Comprehensive Local Research Network which operates as part of the National Institute for Health Research Comprehensive Clinical Research Network in England. The funding sources had no role in design or conduct of the study; the collection, management, analysis, or interpretation of the data; or the preparation, review, or approval of the manuscript.

### 3.0 SUPPLEMENTAL APPENDICES

#### 3.1 Eligibility Criteria

| Inclusion Criteria |                                                                                                                                                           |
|--------------------|-----------------------------------------------------------------------------------------------------------------------------------------------------------|
| 1)                 | Adult men or women aged 50 years and older (with no upper age limit).                                                                                     |
| 2)                 | Fracture of the femoral neck confirmed with either anteroposterior and lateral hip radiographs, computed tomography, or magnetic resonance imaging (MRI). |
| 3)                 | Operative treatment of displaced fractures within four days of presenting to the emergency room.                                                          |
| 4)                 | Operative treatment of undisplaced fractures within seven days of presenting to the emergency room.                                                       |
| 5)                 | Patient was ambulatory prior to fracture, though they may have used an aid such as a cane or a walker.                                                    |
| 6)                 | Anticipated medical optimization for operative fixation of the hip.                                                                                       |
| 7)                 | Provision of informed consent by patient or legal guardian.                                                                                               |
| 8)                 | No other major trauma (defined as an Injury Severity Score >16*).                                                                                         |
| 9)                 | Low energy fracture, in the judgment of the attending surgeon.                                                                                            |

  

| Exclusion Criteria |                                                                                                                                                                                                                                     |
|--------------------|-------------------------------------------------------------------------------------------------------------------------------------------------------------------------------------------------------------------------------------|
| 1)                 | Patients not suitable for internal fixation (i.e., severe osteoarthritis, rheumatoid arthritis, or pathologic fracture).                                                                                                            |
| 2)                 | Associated major injuries of the lower extremity (i.e., ipsilateral or contralateral fractures of the foot, ankle, tibia, fibula, knee, or femur; dislocations of the ankle, knee, or hip; or femoral head defects or fracture).    |
| 3)                 | Retained hardware around the affected hip.                                                                                                                                                                                          |
| 4)                 | Infection around the hip (i.e., soft tissue or bone).                                                                                                                                                                               |
| 5)                 | Patients with disorders of known bone metabolism except osteoporosis (i.e., Paget's disease, renal osteodystrophy, osteomalacia).                                                                                                   |
| 6)                 | Patients with a history of frank dementia that would interfere with assessment of the primary outcome (i.e., re-operation at two years).                                                                                            |
| 7)                 | Likely problems, in the judgment of the investigators, with maintaining follow-up (i.e., patients with no fixed address, report a plan to move out of town, or intellectually challenged patients without adequate family support). |

#### 3.2 Trial Interventions and Standardization of Peri-Operative Care

##### A. Multiple Cancellous Screws

Surgeons were allowed to use any threaded screw or hook pin (i.e., Gouffon, Uppsala, von Bahr, Hansson hook pins, etc.) or cancellous threaded screw (i.e., cannulated or non-cannulated, Depuy-ACE screws, AO/Association for the Study of Internal Fixation (ASIF), Asnis, Richards, etc.). Surgeons followed the technique guides associated with the screw manufacturers.

Surgeons documented the following:

1. Number of screws.
2. Number of washers.
3. Manufacturer.
4. Reduction technique.
5. Decision to perform a capsulotomy or aspirate intracapsular hematoma.
6. Screw configurations, especially of the third screw (outside of two critical placements inferiorly and posteriorly).

No injectable bone substitutes were allowed for augmentation of the implant fixation.

##### B. Sliding Hip Screw

Patients allocated to sliding hip screws received a single larger diameter partially threaded screw affixed to the proximal femur with a sideplate (with a minimum of two holes and a maximum of four holes) and no supplemental fixations. Surgeons were permitted to use any commercially available sliding hip screw implant (i.e., Stryker, DePuy-ACE, Synthes, Smith and Nephew, Zimmer, etc.), and were to insert implants as per the manufacturers' technical guides. The derotational kirschner wire was to penetrate the acetabulum to provide maximal resistance to torsion. A centre-to-centre approach was recommended, while avoiding a superior and anterior approach. Spiral



blades and helical screws were permitted, because they function similarly to the sliding hip screw. It was documented when spiral blades were employed by the surgeon.

The use of a compression screw, manufacturer, reduction technique, decision to perform a capsulotomy, aspiration of intracapsular hematoma, and final screw position measured by the Tip Apex Distance was documented and based upon surgeon preference. No injectable bone substitutes were allowed for augmentation of the implant fixation.

### **C. Standardization of Procedures and Peri-Operative Care**

Patient positioning, fracture reduction, and surgical exposure in the operating room were not standardized as these are as these are highly variable across the world. There was, however, specific criteria for fracture reduction acceptability. Acceptable reductions were left to the surgeons' best judgment, while aiming at three standards for translation in the anteroposterior and lateral fracture planes:

1. Less than 100% cortical displacement.
2. 10% or less translation of the femoral neck.
3. 3 mm of absolute translation on fluoroscopic views.

To ensure similar peri-operative regimens, it was recommended that participating centres standardize key aspects of pre- and post-operative care.

#### Pre-Operative Care

1. Pre-operative antibiotic prophylaxis (i.e., cephalosporin or equivalent coverage).
2. Thromboprophylaxis (i.e., Thromboembolic Disease Stockings (TEDS), pneumatic compression boots, or medical prophylaxis to be discontinued in sufficient time to allow surgery as guided by International Normalized Ratio (INR)/Partial Thromboplastin Time (PTT)).
3. Medical consultation to optimize condition prior to surgery.

#### Post-Operative Care

1. Antibiotic prophylaxis (i.e., cephalosporin or equivalent) for 24 hours.
2. Thromboprophylaxis with unfractionated heparin, Low Molecular Weight Heparin (LMWH), warfarin, anti-platelet agents, or intermittent pneumatic compression boots (current American College of Chest Physicians (ACCP) guidelines recommend LMWH or adjusted dose warfarin (goal INR 2.5; range 2-3)).
3. Weightbearing as tolerated was allowed as patients autoprotect the affected hip during rehabilitation. Post-surgery, patients were encouraged to be weightbearing as tolerated and then advanced according to the attending surgeon's best judgment (i.e., touch weightbearing for displaced fractures was permitted and then advanced according to the surgeon's best judgment).
4. Calcium 600 mg by mouth (PO) daily and/or vitamin D 1000 International Units (IU) per day (provided there were no contraindications), or further investigation and treatment of osteoporosis as recommended by a local osteoporosis expert/consultant as necessary.
5. Appropriate nutritional assessment with administration of oral micronutrient feeds as needed.

#### Other Care

Due to a lack of evidence favouring a particular approach, the following was recorded but not standardized:

1. Use of pre-operative traction.
2. Surgical delay.
3. Type of anesthetic (i.e., general versus regional).
4. Physiotherapy and rehabilitation programs.

### **3.3 Threshold Performance for Internal Fixation**

Surgeons who participated in the FAITH trial were asked to meet two criteria for expertise for either cancellous screw fixation or sliding hip screw fixation:

1. Surgeons should have performed at least 25 procedures (of either sliding hip screws and/or cancellous screws) in their career (including residency experience in which they assumed responsibility for the procedure).
2. Surgeons should have continued to perform the procedure (at least five per year of either sliding hip screws and/or cancellous screws) in the year prior to the trial start date.

Any combination of procedures (cancellous screws and/or sliding hip screws) performed by surgeons were accepted as expertise. Additionally, any combination of these procedures performed for any type of hip fracture (i.e., femoral neck fracture, intertrochanteric fracture, etc.) were accepted as expertise.

### 3.4 Follow-up Processes

| Time-point | Assessments                                                                           | Patient Questionnaires |
|------------|---------------------------------------------------------------------------------------|------------------------|
| 1 week     | Follow-up form, reoperations, and adverse events                                      | SF-12, EQ-5D, WOMAC*   |
| 2 weeks**  | Follow-up form, reoperations, and adverse events                                      | SF-12, EQ-5D, WOMAC*   |
| 10 weeks   | Follow-up form, radiographs, reoperations, and adverse events                         | SF-12, EQ-5D, WOMAC*   |
| 6 months   | Follow-up form, radiographs (if necessary/possible), reoperations, and adverse events | SF-12, EQ-5D, WOMAC*   |
| 9 months   | Follow-up form, radiographs (if necessary/possible), reoperations, and adverse events | SF-12, EQ-5D, WOMAC*   |
| 12 months  | Follow-up form, radiographs (if necessary/possible), reoperations, and adverse events | SF-12, EQ-5D, WOMAC*   |
| 18 months  | Follow-up form, radiographs (if necessary/possible), reoperations, and adverse events | SF-12, EQ-5D, WOMAC*   |
| 24 months  | Follow-up form, radiographs (if necessary/possible), reoperations, and adverse events | SF-12, EQ-5D, WOMAC*   |

SF-12=Short Form 12; EQ-5D=EuroQol 5 Dimensions; WOMAC= Western Ontario and McMaster Universities Arthritis Index

\*For a sub-set of participants

\*\*Removed to reduce participant burden

### 3.5 Outcome Definitions

#### Primary Outcomes

| Outcome                         | Definition                                                                                                                                                                                                                                                                                                                                                                                                                                                 |
|---------------------------------|------------------------------------------------------------------------------------------------------------------------------------------------------------------------------------------------------------------------------------------------------------------------------------------------------------------------------------------------------------------------------------------------------------------------------------------------------------|
| Re-operations (study event)     | Re-operations that were classified as study events included: <ul style="list-style-type: none"> <li>○ Implant removal</li> <li>○ Implant exchange – Total hip arthroplasty</li> <li>○ Implant exchange – Hemiarthroplasty</li> <li>○ Implant exchange – Internal fixation</li> <li>○ Implant exchange – Spacer</li> <li>○ Soft tissue procedure</li> <li>○ Other event as determined by the adjudication committee (proximal femoral osteotomy)</li> </ul> |
| Re-operations (non-study event) | Re-operations that were not classified as study events included: <ul style="list-style-type: none"> <li>○ Irrigation and debridement</li> <li>○ Wound closure</li> <li>○ Planned re-operation</li> <li>○ Elective implant removal after fracture healing</li> </ul>                                                                                                                                                                                        |

#### Secondary Outcomes

| Outcome                         | Definition                                                                                                                                                                                                                                                                                                                                                                                                                                                                                                                            |
|---------------------------------|---------------------------------------------------------------------------------------------------------------------------------------------------------------------------------------------------------------------------------------------------------------------------------------------------------------------------------------------------------------------------------------------------------------------------------------------------------------------------------------------------------------------------------------|
| Fracture Complications          | The Adjudication Committee reviewed fracture complications including avascular necrosis, nonunion, implant failure, and infections.                                                                                                                                                                                                                                                                                                                                                                                                   |
| Mortality                       | Mortality was adjudicated and it was considered to be an event if it occurred within 24 month of the fracture.                                                                                                                                                                                                                                                                                                                                                                                                                        |
| Fracture Healing and Shortening | The Adjudication Committee reviewed all available x-rays for fracture healing. In healed fractures, the Adjudication Committee assessed how much the fracture shortened (No shortening, ≤5 mm [mild], 6-10mm [moderate], >10mm [severe]).                                                                                                                                                                                                                                                                                             |
| Medical Adverse Events          | Medical adverse events, as diagnosed by physicians at the clinical sites, were documented.                                                                                                                                                                                                                                                                                                                                                                                                                                            |
| Health-Related Quality of Life  | The health-related quality of life outcomes being analyzed included: <ul style="list-style-type: none"> <li>• SF-12 Physical Component Score, which measures self-reported quality of life through physical summary measures and a preference-based health utility index</li> <li>• EQ-5D, which is a standardized instrument for use as a measure of health outcome</li> <li>• WOMAC, which is self-administered and assesses the three dimensions of pain, disability and joint stiffness in knee and hip osteoarthritis</li> </ul> |

### 3.6 Overview of Adjudication

#### Adjudication Processes

The following information was excerpted from the FAITH Adjudication Charter, which documents the responsibilities of the Adjudication Committee and the adjudication processes for the FAITH trial.

### 1) Fracture Eligibility

The Adjudication Committee adjudicated fracture eligibility in cases where eligibility was in doubt based on available pre-surgery and post-surgery x-rays, and completed case report forms. Fracture eligibility was not affected by the implant used, even in situations where the patient did not receive cancellous screws or a sliding hip screw (a protocol deviation).

### 2) Radiographic Characteristics and Quality of Surgery

The Adjudication Committee classified the level of the femoral neck fracture as subcapital, midcervical or basal, determined the type of fracture and classified it as being undisplaced (Garden I or II) or displaced (Garden III or IV), and classified the fracture using the Pauwels' classification. The Committee determined if the quality of the reduction and the quality of implant placement were acceptable or unacceptable.

### 3) Fracture Healing

The Adjudication Committee began assessment of a patient's fracture healing after the patient's 24-month follow-up. They adjudicated all available radiographic visits at and after the week 10 time point. Along with fracture healing, the Committee assessed the amount of fracture shortening as follows: no shortening, mild shortening ( $\leq 5$  mm), moderate shortening (6-10mm), or severe shortening ( $>10$ mm).

### 4) Re-operations

The Adjudication Committee adjudicated re-operations after each patient had completed their 24-month follow-up (or following early withdrawal). Specifically, the Committee adjudicated all re-operations to promote fracture healing, relieve pain, treat infection, or improve function. The Committee reviewed all available x-rays, and data from the patient's completed case report forms. Planned re-operations were not considered events.

### 5) Fracture-Related Complications

The Adjudication Committee adjudicated fracture-related complications after each patient had completed their 24-month follow-up (or following early withdrawal). The Committee reviewed all available x-rays, and data from the patient's completed case report forms.

### 6) Mortality

The Adjudication Committee adjudicated mortality as required following a patient's early withdrawal. The Committee reviewed all data from the patient's completed case report forms.

## 3.7 Sample Size Calculations (FAITH Investigators. BMC Musculoskeletal Disorders 2014, 15:219)

### Estimated study power for 750 patients per treatment arm (N = 1500)

| Baseline risk<br>(Year 1) <sup>^</sup> | Relative risk reduction |       |              |              |              |
|----------------------------------------|-------------------------|-------|--------------|--------------|--------------|
|                                        | 10%                     | 15%   | 20%          | 25%          | 30%          |
| 20%                                    | 15.9%                   | 30.8% | 50.5%        | 70.5%        | <b>86.1%</b> |
| 25%                                    | 19.6%                   | 38.7% | 61.6%        | <b>81.5%</b> | <b>93.5%</b> |
| 30%                                    | 23.6%                   | 46.8% | 71.7%        | <b>89.3%</b> | <b>97.4%</b> |
| 35%                                    | 28.2%                   | 55.2% | <b>80.3%</b> | <b>94.5%</b> | <b>99.1%</b> |
| 40%                                    | 33.3%                   | 63.6% | <b>87.3%</b> | <b>97.5%</b> | <b>99.7%</b> |

\*Number of patients per treatment arm, alpha = 0.05.

<sup>^</sup>Year 2 risk is 1/3 that of year 1.

Bold numbers indicate statistical power range for this study.

### Estimated study power for 500 patients per treatment arm (N = 1,000)

| Baseline risk<br>(Year 1) <sup>^</sup> | Relative risk reduction |       |       |       |              |              |              |
|----------------------------------------|-------------------------|-------|-------|-------|--------------|--------------|--------------|
|                                        | 10%                     | 15%   | 20%   | 25%   | 30%          | 35%          | 40%          |
| 15.5%                                  | 14.5%                   | 28.5% | 48.1% | 69.3% | <b>86.3%</b> | <b>95.7%</b> | <b>99.2%</b> |

\*Number of patients per treatment arm, alpha = 0.05.

<sup>^</sup>Year 2 risk is 27.2%.

Bold numbers indicate statistical power range for this study.

### **3.8 Subgroup Analyses and Hypothesized Effects**

At the onset of the FAITH trial, we identified one important subgroup and planned to perform the analysis with the primary endpoint as the outcome:

1. Displaced vs undisplaced fractures – We hypothesize that sliding hip screw will perform better in patients with displaced fractures

At the end of the trial but prior to unblinding, we identified another five subgroup analyses and corresponding hypotheses on their effects:

1. Normal BMI vs Overweight or Obese BMI – We hypothesize that sliding hip screw will perform better in obese patients
2. Level of the Fracture Line – We hypothesize that sliding hip screw will perform better in base of neck fractures (basicervical)
3. Pauwel’s Classification – We hypothesize that sliding hip screw will perform better in more vertical fracture lines (Higher Pauwel’s class)
4. Smoking Status – We hypothesize that sliding hip screw will perform better in current smokers.
5. Quality of Reduction – We hypothesize that sliding hip screw will perform better with unacceptable reduction. It should be noted that quality of reduction was assessed following fixation and post-randomization; therefore any conclusions that we make based on a significant subgroup effect will be hypothesis-generating.

After unblinding, we identified a single post hoc subgroup analysis:

1. Age – We hypothesize that there will be no significant differences in performance between sliding hip screw and cancellous screw in patients under the age of 60. For patients between the ages of 60 and 80 years of age, we hypothesize that sliding hip screw will perform better. For patients over 80 years of age, we hypothesize that sliding hip screw will perform better.

### **3.9 Rationale for Excluding Ineligible Patients from Analyses**

In addressing the issue of how to manage patients who were inadvertently/incorrectly randomized despite not satisfying all criteria for eligibility, we were guided by the recommendations of Fergusson et al. The authors of this paper maintain that including ineligible patients in the analyses for clinical trials adds random error and therefore decreases the power of the trial to answer the question(s) being addressed.

One must accept this added random error if it is not possible to exclude such patients without introducing bias. It is, however, often possible to exclude ineligible patients without bias. This requires the following conditions: i) The relevant information documenting patient ineligibility is collected soon after randomization ii) the Adjudication Committee making the decision about excluding ineligible patients is unaware of the treatment allocation and iii) the Adjudication Committee making the decision is unaware of the outcome of the patients who prove ineligible. In the current study, we ensured all three conditions were met for any randomized patients excluded from the analysis.

#### Reference:

Fergusson D, Aaron S, Guyatt GH, Hebert P. Post-randomization exclusion of patients enrolled in clinical trials: The intention-to-treat principle does not necessitate that all patients be analyzed. *BMJ* 2002;325:652-4.

#### 4.0 SUPPLEMENTARY TABLES

**Table S1a: Reasons for Exclusion by Clinical Sites**

| Reason for Exclusion N=5463*                                                    | N(%)         |
|---------------------------------------------------------------------------------|--------------|
| Surgeon Preference: Requires HA, THA, Prosthesis, Bipolar                       | 2060 (37.7%) |
| Surgeon Preference: Unsuitable for internal fixation (arthritis/pathologic)     | 1738 (31.8%) |
| Cognitive impairment                                                            | 1110 (20.3%) |
| Declined to consent                                                             | 589 (10.8%)  |
| Anticipated problematic follow-up                                               | 515 (9.4%)   |
| Less than 50 years old                                                          | 319 (5.8%)   |
| Not medically optimized                                                         | 305 (5.6%)   |
| Major trauma                                                                    | 292 (5.3%)   |
| High energy fracture                                                            | 250 (4.6%)   |
| Not ambulatory pre-injury                                                       | 227 (4.2%)   |
| Chronic condition or multiple comorbidities                                     | 211 (3.9%)   |
| Fracture cannot be closed reduced                                               | 211 (3.9%)   |
| National guidelines (for Dutch patients)                                        | 199 (3.6%)   |
| Associated injuries                                                             | 191 (3.5%)   |
| Displaced fracture not treatable within 4 days of emergency room presentation   | 154 (2.8%)   |
| Undisplaced fracture not treatable within 7 days of emergency room presentation | 116 (2.1%)   |
| Surgeon Preference: Requires specific fixation type                             | 82 (1.5%)    |
| Retained hardware                                                               | 79 (1.4%)    |
| Another trial participant                                                       | 76 (1.4%)    |
| Surgeon who is not participating in the study                                   | 73 (1.3%)    |
| Language/communication barrier                                                  | 70 (1.3%)    |
| Metabolic bone disease                                                          | 64 (1.2%)    |
| Severe Parkinson's disease                                                      | 54 (1.0%)    |
| Non-operative or conservative treatment                                         | 46 (0.8%)    |
| Infection                                                                       | 43 (0.8%)    |
| Other reasons                                                                   | 26 (0.5%)    |
| No femoral neck fracture                                                        | 23 (0.4%)    |
| Not seen within time frame                                                      | 6 (0.1%)     |
| Missed**                                                                        | 146          |

HA=hemiarthroplasty; THA=total hip arthroplasty;

\*Please note, some patients were excluded for more than one reason

\*\*Missed: patients who were not screened for study inclusion as result of error or lack of study staff availability

**Table S1b: Reasons for Exclusion by the Adjudication Committee**

| <b>Reason for Exclusion N=29</b>                                              | <b>N(%)</b> |
|-------------------------------------------------------------------------------|-------------|
| Ineligible fracture                                                           | 15 (51.7%)  |
| Delayed surgical treatment beyond 4 days                                      | 6 (20.7%)   |
| Not 50 years or older                                                         | 2 (6.9%)    |
| Other major trauma                                                            | 2 (6.9%)    |
| Delayed surgical treatment beyond 7 days                                      | 1 (3.5%)    |
| Patient did not have anticipated medical optimization                         | 1 (3.5%)    |
| Does not have a low energy fracture in the judgement of the attending surgeon | 1 (3.5%)    |
| Retained hardware around the hip (i.e., soft tissue or bone)                  | 1 (3.5%)    |

**Table S2: Surgical and Peri-Operative Management**

|                                                                   | <b>Sliding Hip Screw<br/>N=542</b> | <b>Cancellous Screws<br/>N=537</b> | <b>Total<br/>N=1079</b> |
|-------------------------------------------------------------------|------------------------------------|------------------------------------|-------------------------|
| Time From Injury to Surgery, mean (SD) (hours)                    | N=496<br>50.4 (69.5)               | N=498<br>47.1 (61.9)               | N=994<br>48.8 (65.8)    |
| Length of Procedure, mean (SD) (minutes)                          | N=531<br>64.6 (33.2)               | N=529<br>55.1 (33.9)               | N=1060<br>59.8 (33.9)   |
| Who Performed Majority of Procedure, n (%)                        | N=533                              | N=532                              | N=1065                  |
| Surgeon                                                           | 292 (54.8%)                        | 295 (55.5%)                        | 587 (55.1%)             |
| Resident                                                          | 214 (40.2%)                        | 214 (40.2%)                        | 428 (4.02%)             |
| Fellow                                                            | 21 (3.9%)                          | 16 (3.0%)                          | 37 (3.5%)               |
| Registrar                                                         | 6 (1.1)                            | 7 (1.3%)                           | 13 (1.2%)               |
| Type of Anaesthesia, n (%)                                        | N=533                              | N=532                              | N=1065                  |
| General                                                           | 327 (61.4%)                        | 316 (59.4%)                        | 643 (60.4%)             |
| Regional                                                          | 218 (40.9%)                        | 222 (41.7%)                        | 440 (41.3%)             |
| Total Blood Loss, mean (SD) (mL)                                  | 126.6 (106.9)                      | 70.3 (95.7)                        | 98.6 (105.2)            |
| Capsulotomy Performed, n (%)                                      | N=531                              | N=531                              | N=1062                  |
| Yes                                                               | 48 (9.0%)                          | 45 (8.5%)                          | 93 (8.8%)               |
| No                                                                | 483 (91.0%)                        | 486 (91.5%)                        | 969 (91.2)              |
| Aspiration of Intracapsular Hemotoma, n (%)                       | N=533                              | N=532                              | N=1065                  |
| Yes                                                               | 18 (3.4%)                          | 21 (4.0%)                          | 39 (3.7%)               |
| No                                                                | 515 (96.6%)                        | 511 (96.0%)                        | 1026 (96.3%)            |
| Post-operative Antibiotic Prophylaxis, n (%)                      | N=533                              | N=532                              | N=1065                  |
| Yes                                                               | 526 (98.7%)                        | 522 (98.1%)                        | 1048 (98.4%)            |
| No                                                                | 7 (1.3%)                           | 10 (1.9%)                          | 17 (1.6%)               |
| Thromboprophylaxis, n (%)                                         | N=533                              | N=532                              | N=1065                  |
| No                                                                | 3 (0.6%)                           | 2 (0.4%)                           | 5 (0.5%)                |
| Yes                                                               | 530 (99.4%)                        | 530 (99.6%)                        | 1060 (99.5%)            |
| Heparin                                                           | 46 (8.6%)                          | 57 (10.8%)                         | 103 (9.7%)              |
| LWMH                                                              | 427 (80.6%)                        | 426 (80.4%)                        | 853 (80.0%)             |
| Warfarin                                                          | 21 (4.0%)                          | 28 (5.3%)                          | 49 (4.6%)               |
| Mechanical                                                        | 104 (19.6%)                        | 91 (17.1%)                         | 195 (18.4%)             |
| Other                                                             | 39 (7.4%)                          | 37 (7.0%)                          | 76 (7.2%)               |
| Weightbearing, n (%)                                              | N=533                              | N=532                              | N=1065                  |
| Yes, as tolerated                                                 | 503 (94.4%)                        | 494 (92.9%)                        | 997 (93.6%)             |
| Non-weightbearing                                                 | 30 (5.6%)                          | 38 (7.1%)                          | 68 (6.4%)               |
| Full weightbearing                                                | 0 (0%)                             | 0 (0%)                             | 0 (0%)                  |
| Patient taking 600mg of Calcium and/or 1000mg of Vitamin D, n (%) | N=533                              | N=531                              | N=1064                  |
| Yes                                                               | 505 (94.8%)                        | 493 (92.8%)                        | 998 (93.8%)             |
| No                                                                | 28 (5.2%)                          | 38 (7.2%)                          | 66 (6.2%)               |
| Patient Discharge Location, n (%)                                 | N=531                              | N=528                              | N=1059                  |
| Home                                                              | 276 (52.0%)                        | 275 (52.1%)                        | 551 (52.0%)             |
| Rehabilitation facility                                           | 169 (31.8%)                        | 167 (31.5%)                        | 336 (31.7%)             |
| Aging and long term care facility                                 | 66 (12.4%)                         | 71 (13.5%)                         | 137 (12.9%)             |
| Other hospital                                                    | 12 (2.2%)                          | 10 (1.9%)                          | 22 (2.1%)               |
| Family member's home                                              | 5 (1.0%)                           | 4 (0.8%)                           | 9 (0.9%)                |
| Assisted living                                                   | 1 (0.2%)                           | 0 (0%)                             | 1 (0.1%)                |
| Deceased                                                          | 2 (0.4%)                           | 1 (0.2%)                           | 3 (0.3%)                |
| Patient Aids at Discharge, n (%)                                  | N=530                              | N=528                              | N=1058                  |
| Bedridden                                                         | 23 (4.3%)                          | 24 (4.6%)                          | 47 (4.4%)               |
| Wheelchair                                                        | 119 (22.5%)                        | 120 (22.7%)                        | 239 (22.6%)             |
| Walker                                                            | 401 (75.7%)                        | 384 (72.7%)                        | 785 (74.2%)             |
| Two crutches                                                      | 99 (18.7%)                         | 99 (18.8%)                         | 198 (18.7%)             |
| One crutch                                                        | 9 (1.7%)                           | 13 (2.5%)                          | 22 (2.1%)               |
| Cane                                                              | 10 (1.9%)                          | 9 (1.7%)                           | 19 (1.8%)               |
| Other                                                             | 14 (2.6%)                          | 12 (2.3%)                          | 26 (2.5%)               |
| Person assistance                                                 | 13 (2.4%)                          | 11 (2.0%)                          | 24 (2.2%)               |
| Stick                                                             | 0 (0%)                             | 1 (0.15%)                          | 1 (0.1%)                |
| Deceased                                                          | 1 (0.2%)                           | 1 (0.15%)                          | 2 (0.2%)                |

SD=standard deviation

**Table S3: Cancellous Screw Surgical Management**

|                                                     | <b>Cancellous Screws<br/>N=537</b> | <b>Patients Crossed from Sliding<br/>Hip Screw<br/>N=16</b> |
|-----------------------------------------------------|------------------------------------|-------------------------------------------------------------|
| Hook Pins Used, n (%)                               | N=508                              |                                                             |
| Yes                                                 | 22 (4.3%)                          | 0 (0%)                                                      |
| No                                                  | 486 (95.7%)                        | 16 (100%)                                                   |
| Number of Screws Used, n (%)                        | N=509                              |                                                             |
| 1                                                   | 0 (0%)                             | 0 (0%)                                                      |
| 2                                                   | 28 (5.5%)                          | 1 (6.2%)                                                    |
| 3                                                   | 464 (91.2%)                        | 15 (93.8%)                                                  |
| 4                                                   | 15 (2.9%)                          | 0 (0%)                                                      |
| 5                                                   | 2 (0.4%)                           | 0 (0%)                                                      |
| Diameter of Screws, mean (SD)                       | N=509<br>7.3 (3.5)                 | 7.0 (0.4)                                                   |
| Partially Threaded Screws with Short Threads, n (%) | N=508                              |                                                             |
| 0                                                   | 92 (18.1)                          | 3 (18.8%)                                                   |
| 1                                                   | 29 (5.7%)                          | 3 (18.8%)                                                   |
| 2                                                   | 59 (11.6%)                         | 1 (6.2%)                                                    |
| 3                                                   | 322 (63.4%)                        | 9 (56.2%)                                                   |
| 4                                                   | 5 (1.0%)                           | 0 (0%)                                                      |
| 5                                                   | 1 (0.2%)                           | 0 (0%)                                                      |
| Partially Threaded Screws with Long Threads, n (%)  | N=508                              |                                                             |
| 0                                                   | 345 (67.9%)                        | 9 (56.3%)                                                   |
| 1                                                   | 40 (7.9%)                          | 2 (12.5%)                                                   |
| 2                                                   | 42 (8.3%)                          | 2 (12.5%)                                                   |
| 3                                                   | 77 (15.1%)                         | 3 (18.7%)                                                   |
| 4                                                   | 4 (0.8%)                           | 0 (0%)                                                      |
| Formation of screws, n (%)                          | N=509                              |                                                             |
| 2 Screws Vertical                                   | 10 (2.0%)                          | 1 (6.3%)                                                    |
| 2 Screws Inferior and Posterior                     | 16 (3.1%)                          | 0 (0%)                                                      |
| 3 Screws Triangle (apex at top)                     | 147 (28.9%)                        | 4 (25%)                                                     |
| 3 Screws Triangle apex at bottom)                   | 308 (60.5%)                        | 11 (68.7%)                                                  |
| 4 Screws Square                                     | 6 (1.2%)                           | 0 (0%)                                                      |
| 4 Screws Diamond                                    | 7 (1.4%)                           | 0 (0%)                                                      |
| Other                                               | 15 (2.9%)                          | 0 (0%)                                                      |
| Screw Aim, n (%)                                    | N=509                              |                                                             |
| Parallel                                            | 442 (86.8%)                        | 14 (87.5%)                                                  |
| Converging                                          | 13 (2.6%)                          | 0 (0%)                                                      |
| Diverging                                           | 54 (10.6%)                         | 2 (12.5%)                                                   |
| Number of Washers, n (%)                            | N=509                              |                                                             |
| 0                                                   | 283 (55.6%)                        | 5 (31.3%)                                                   |
| 1                                                   | 34 (6.7%)                          | 1 (6.3%)                                                    |
| 2                                                   | 68 (13.3%)                         | 3 (18.8%)                                                   |
| 3                                                   | 118 (23.2%)                        | 7 (43.7%)                                                   |
| 4                                                   | 5 (1.0%)                           | 0 (0%)                                                      |
| 7                                                   | 1 (0.2%)                           | 0 (0%)                                                      |
| Manufacturer, n (%)                                 | N=509                              |                                                             |
| Synthes                                             | 289 (56.8%)                        | 11 (68.8%)                                                  |
| Stryker                                             | 22 (4.3%)                          | 0 (0%)                                                      |
| DePuy                                               | 38 (7.5%)                          | 0 (0%)                                                      |
| Smith & Nephew                                      | 35 (6.9%)                          | 0 (0%)                                                      |
| Biomet                                              | 8 (1.5%)                           | 0 (0%)                                                      |
| Zimmer                                              | 39 (7.7%)                          | 1 (6.2%)                                                    |
| Hansson                                             | 1 (0.2%)                           | 0 (0%)                                                      |
| Other                                               | 77 (15.1%)                         | 4 (25.0%)                                                   |

SD=standard deviation



**Table S4: Sliding Hip Screw Surgical Management**

|                                      | <b>Sliding Hip Screw<br/>N=542</b> | <b>Patients Crossed from Cancellous<br/>Screws<br/>N=6</b> |
|--------------------------------------|------------------------------------|------------------------------------------------------------|
| Manufacturer, n (%)                  | N=503                              |                                                            |
| Synthes                              | 361 (71.8%)                        | 4 (66.7%)                                                  |
| Stryker                              | 21 (4.2%)                          | 0 (0%)                                                     |
| DePuy                                | 1 (0.2%)                           | 0 (0%)                                                     |
| Smith & Nephew                       | 23 (4.5%)                          | 0 (0%)                                                     |
| Zimmer                               | 42 (8.4%)                          | 0 (0%)                                                     |
| AO                                   | 0 (0%)                             | 0 (0%)                                                     |
| J&J                                  | 0 (0%)                             | 0 (0%)                                                     |
| Arthrex                              | 0 (0%)                             | 0 (0%)                                                     |
| Other                                | 55 (10.9%)                         | 2 (33.3%)                                                  |
| Formation of screws, n (%)           | N=503                              |                                                            |
| Centre-centre Position               | 368 (73.2%)                        | 4 (66.7%)                                                  |
| Superior Position                    | 3 (0.6%)                           | 0 (0%)                                                     |
| Anterior Position                    | 11 (2.1%)                          | 0 (0%)                                                     |
| Inferior Position                    | 89 (17.7%)                         | 2 (33.3%)                                                  |
| Posterior Position                   | 19 (3.8%)                          | 0 (0%)                                                     |
| Other                                | 13 (2.6%)                          | 0 (0%)                                                     |
| Number of Holes in Sideplate, n (%)  | N=503                              |                                                            |
| 1                                    | 1 (0.2%)                           | 0 (0%)                                                     |
| 2                                    | 387 (76.9%)                        | 4 (66.7%)                                                  |
| 3                                    | 24 (4.8%)                          | 0 (0%)                                                     |
| 4                                    | 80 (15.9%)                         | 2 (33.3%)                                                  |
| 5                                    | 1 (0.2%)                           | 0 (0%)                                                     |
| 6                                    | 2 (0.4%)                           | 0 (0%)                                                     |
| 7                                    | 8 (1.6%)                           | 0 (0%)                                                     |
| Bicortical Sideplate, n (%)          | N=503                              |                                                            |
| Yes                                  | 1 (0.2%)                           | 0 (0%)                                                     |
| No                                   | 502 (99.8%)                        | 6 (100%)                                                   |
| Supplemental Screws Used, n (%)      | N=503                              |                                                            |
| No                                   | 388 (77.1%)                        | 4 (66.7%)                                                  |
| Yes                                  | 115 (22.9%)                        | 2 (33.3%)                                                  |
| With washer                          | 30 (26.1%)                         | 2 (100%)                                                   |
| Without washer                       | 85 (73.9%)                         | 0 (0%)                                                     |
| Supplemental Screw Placement, n (%)  | N=115                              |                                                            |
| All left in place                    | 96 (83.5%)                         | 1 (50%)                                                    |
| All used and removed                 | 15 (13.0%)                         | 0 (0%)                                                     |
| Some left in place                   | 4 (3.5%)                           | 1 (50%)                                                    |
| Spiral Blades Used, n (%)            | N=503                              |                                                            |
| Yes                                  | 1 (0.2%)                           | 0 (0%)                                                     |
| No                                   | 502 (99.8%)                        | 6 (100%)                                                   |
| Helical Screws Used, n (%)           | N=503                              |                                                            |
| Yes                                  | 0 (0%)                             | 0 (0%)                                                     |
| No                                   | 503 (100%)                         | 6 (100%)                                                   |
| Tip to Apex Distance, mean (SD) (mm) | N=503<br>17.3 (12.0)               | 26.0 (14.5)                                                |

SD=standard deviation

**Table S5: Study Outcomes by Treatment Group for Undisplaced Fractures**

|                                      | Overall     | Sliding Hip Screw | Cancellous Screws | Hazard Ratio       | p value |
|--------------------------------------|-------------|-------------------|-------------------|--------------------|---------|
|                                      | N=729       | N=360             | N=369             | (95% CI)           |         |
| Primary Endpoint (re-operation)      | 120 (16.5%) | 60 (16.7%)        | 60 (16.3%)        | 1.00 (0.69, 1.46)  | 0.99    |
| Implant Removal                      | 31 (4.3%)   | 6 (1.7%)          | 25 (6.8%)         | 0.25(0.10, 0.59)   | 0.001   |
| Implant Exchange – THA               | 58 (8.0%)   | 40(11.1%)         | 18 (4.9%)         | 2.33 (1.30, 4.17)  | 0.004   |
| Implant Exchange – HA                | 30 (4.1%)   | 15 (4.2%)         | 15 (4.1%)         | 1.03 (0.51, 2.07)  | 0.95    |
| Implant Exchange – Internal Fixation | 9 (1.2%)    | 1 (0.3%)          | 8 (2.2%)          | 0.13 (0.02, 1.02)  | 0.04    |
| Implant Exchange – Spacer            | 2 (0.3%)    | 1 (0.3%)          | 2 (0.3%)          | 1.03 (0.06, 16.33) | 0.99    |
| Soft Tissue Procedure                | 1 (0.1%)    | 0 (0%)            | 1 (0.3%)          | 0.34 (0.01, 8.36)  | 0.32    |
| Proximal Femoral Osteotomy           | 1 (0.1%)    | 1 (0.3%)          | 0 (0%)            | 3.07(0.13, 75.23)  | 0.31    |
| Secondary Endpoints                  |             |                   |                   |                    |         |
| Avascular Necrosis                   | 56 (7.7%)   | 33 (9.2%)         | 23 (6.2%)         | 1.77 (0.89, 3.51)  | 0.10    |
| Nonunion                             | 27 (3.7%)   | 18(5.0%)          | 9 (2.4%)          | 2.05 (0.93, 4.50)  | 0.07    |
| Implant Failure                      | 38 (5.2%)   | 18 (5.0%)         | 20 (5.4%)         | 0.92 (0.50, 1.71)  | 0.80    |
| Infection                            | 7 (1.0%)    | 2 (0.6%)          | 5 (1.4%)          | 0.41 (0.08, 2.10)  | 0.27    |
| Superficial                          | 2 (0.3%)    | 0 (0%)            | 2 (0.5%)          | 0.21 (0.01, 4.26)  | 0.16    |
| Deep                                 | 5 (0.7%)    | 2 (0.6%)          | 3 (0.8%)          | 0.68 (0.11, 4.07)  | 0.67    |
| Fracture Healing (N=571)*            |             |                   |                   |                    | 0.19    |
| Healed by Month 24                   | 418 (73.2%) | 198 (70.2%)       | 220 (76.1%)       |                    |         |
| Not Healed by Month 24               | 1 (0.2%)    | 1 (0.4%)          | 0 (0%)            |                    |         |
| Not Healed at Time of Last Visit     | 152 (26.6%) | 83 (29.4%)        | 69 (23.9%)        |                    |         |
| Fracture Shortening >5mm (N=418)**   | 81 (19.4%)  | 32 (16.2%)        | 49 (22.3%)        | 0.73 (0.49, 1.08)  | 0.11    |
| Mortality                            | 115 (17.3%) | 48 (14.6%)        | 67 (19.8%)        | 0.69 (0.47, 1.02)  | 0.06    |

THA=total hip arthroplasty; HA=hemiarthroplasty

Relative risk was calculated where the total number of events is less than 50

\*571 patients were included in the fracture healing analysis. 284 patients did not have x-rays available for fracture healing adjudication, and therefore were not included in the denominator.

\*\*418 patients were included in the shortening analysis based on the number of healed fractures with shortening data.

**Table S6: Health-Related Quality of Life by Treatment Groups for Undisplaced Fractures**

|                  | Sliding Hip Screw<br>Mean (SD), N | Cancellous Screws<br>Mean (SD), N | Adjusted Mean Difference<br>(95% CI) | p Value for Differences<br>Between Groups/ |
|------------------|-----------------------------------|-----------------------------------|--------------------------------------|--------------------------------------------|
| <b>12 Months</b> |                                   |                                   |                                      |                                            |
| SF-12 PCS        | 39.9 (11.2), 158                  | 41.6 (10.6), 157                  | -0.02 (-2.14, 2.10), N=298           | 0.99                                       |
| WOMAC            | 45.6(19.9), 160                   | 40.9 (16.5), 158                  | 2.81 (-1.03, 6.64), N=296            | 0.15                                       |
| EQ-5D Index      | 0.77 (0.19), 167                  | 0.80 (0.17), 167                  | -0.01 (-0.05, 0.02), N=314           | 0.44                                       |
| <b>24 Months</b> |                                   |                                   |                                      |                                            |
| SF-12 PCS        | 41.5(10.7), 145                   | 40.2 (11.8), 122                  | 1.32 (-1.27, 3.91), N=245            | 0.32                                       |
| WOMAC            | 40.6 (16.1), 141                  | 39.9 (16.9), 123                  | 0.38 (-3.64, 4.40), N=239            | 0.85                                       |
| EQ-5D Index      | 0.77 (0.20), 156                  | 0.80 (0.18), 139                  | -0.02 (-0.06, 0.02), N=269           | 0.26                                       |

**Table S7: Study Outcomes by Treatment Group for Displaced Fractures**

|                                      | Overall     | Sliding Hip Screw | Cancellous Screws | Hazard Ratio       | p value |
|--------------------------------------|-------------|-------------------|-------------------|--------------------|---------|
|                                      | N=350       | N=182             | N=168             | (95% CI)           |         |
| Primary Endpoint (re-operation)      | 104 (29.7%) | 47 (25.8%)        | 57(33.9%)         | 0.53 (0.34, 0.82)  | 0.005   |
| Implant Removal                      | 43 (12.3%)  | 19 (10.4%)        | 24 (14.3%)        | 0.73 (0.42, 1.28)  | 0.27    |
| Implant Exchange – THA               | 46 (13.1%)  | 24 (13.2%)        | 22 (13.1%)        | 1.00 (0.59, 1.73)  | 0.98    |
| Implant Exchange – HA                | 25 (7.1%)   | 11 (6.0%)         | 14 (8.3%)         | 0.73 (0.34, 1.55)  | 0.41    |
| Implant Exchange – Internal Fixation | 7 (2.0%)    | 1 (0.6%)          | 6 (3.6%)          | 0.15 (0.02, 1.26)  | 0.06    |
| Implant Exchange – Spacer            | 1 (0.3%)    | 0 (0%)            | 1 (0.6%)          | 0.31 (0.01, 7.50)  | 0.30    |
| Soft Tissue Procedure                | 5 (1.4%)    | 4 (2.2%)          | 1 (0.6%)          | 3.69 (0.42, 32.70) | 0.21    |
| Proximal Femoral Osteotomy           | 1 (0.3%)    | 0 (0%)            | 1 (0.6%)          | 0.31 (0.01, 7.50)  | 0.30    |
| <b>Secondary Endpoints</b>           |             |                   |                   |                    |         |
| Avascular Necrosis                   | 22 (6.3%)   | 17 (9.3%)         | 5 (3.0%)          | 3.14 (1.18 , 8.32) | 0.01    |
| Nonunion                             | 39 (11.1%)  | 15 (8.2%)         | 24 (14.3%)        | 0.58 (0.31, 1.06)  | 0.07    |
| Implant Failure                      | 49 (14.0%)  | 24 (13.2%)        | 25 (14.9%)        | 0.89 (0.53, 1.49)  | 0.65    |
| Infection                            | 12 (3.4%)   | 8 (4.4%)          | 4 (2.4%)          | 1.85 (0.57, 6.02)  | 0.30    |
| Superficial                          | 6 (1.7%)    | 4 (2.2%)          | 2 (1.2%)          | 1.85 (0.34, 9.95)  | 0.47    |
| Deep                                 | 6 (1.7%)    | 4 (2.2%)          | 2 (1.2%)          | 1.85 (0.34, 9.95)  | 0.47    |
| Fracture Healing (N=224)*            |             |                   |                   |                    | 0.41    |
| Healed by Month 24                   | 114 (50.9%) | 64 (55.2%)        | 50 (46.3%)        |                    |         |
| Not Healed by Month 24               | 2 (0.9%)    | 1 (0.9%)          | 1 (0.9%)          |                    |         |
| Not Healed at Time of Last Visit     | 108 (48.2%) | 51 (44.0%)        | 57 (52.8%)        |                    |         |
| Fracture Shortening >5mm (N=114)**   | 65 (57.0%)  | 37 (57.8%)        | 28 (56.0%)        | 1.03 (0.75, 1.43)  | 0.85    |
| Mortality                            | 35 (13.1%)  | 20 (14.5%)        | 15 (11.5%)        | 1.12 (0.51, 2.46)  | 0.77    |

THA=total hip arthroplasty; HA=hemiarthroplasty

Relative risk was calculated where the total number of events is less than 50

\*224 patients were included in the fracture healing analysis. 284 patients did not have x-rays available for fracture healing adjudication, and therefore were not included in the denominator.

\*\*114 patients were included in the shortening analysis based on the number of healed fractures with shortening data.

**Table S8: Health-Related Quality of Life by Treatment Groups For Displacement**

|                  | Sliding Hip Screw<br>Mean (SD), N | Cancellous Screws<br>Mean (SD), N | Adjusted Mean Difference<br>(95% CI) | p Value for Differences<br>Between Groups/ |
|------------------|-----------------------------------|-----------------------------------|--------------------------------------|--------------------------------------------|
| <b>12 Months</b> |                                   |                                   |                                      |                                            |
| SF-12 PCS        | 42.8 (10.7), 77                   | 42.6(11.1), 67                    | -0.03 (-3.29, 3.24), N=137           | 0.99                                       |
| WOMAC            | 43.0 (17.4), 80                   | 42.4 (17.3), 68                   | 0.11 (-5.30 5.53), N=142             | 0.97                                       |
| EQ-5D Index      | 0.78 (0.20), 82                   | 0.79 (0.18), 71                   | -0.02 (-0.07, 0.04), N=146           | 0.58                                       |
| <b>24 Months</b> |                                   |                                   |                                      |                                            |
| SF-12 PCS        | 41.8 (11.4), 62                   | 43.8 (11.6), 59                   | -1.13 (-4.79, 2.53), N=113           | 0.54                                       |
| WOMAC            | 41.7 (17.0), 64                   | 39.4 (17.7), 60                   | 0.46 (-5.88, 6.79), N=116            | 0.89                                       |
| EQ-5D Index      | 0.80 (0.19), 76                   | 0.79 (0.20), 68                   | 0.02 (-0.04, 0.07), N=137            | 0.59                                       |

**Table S9: Interaction Between Secondary Outcomes and Smoker Status**

|                            | Overall     | Sliding Hip Screw | Cancellous Screws | Hazard Ratio      | p Value               |
|----------------------------|-------------|-------------------|-------------------|-------------------|-----------------------|
|                            | N=1079      | N=542             | N=537             | (95% CI)          |                       |
| Implant Removal            | 74 (6.9%)   | 25 (4.6%)         | 49 (9.1%)         | 0.42 (0.25, 0.70) | 0.001                 |
| Smoker                     | 18 (9.0%)   | 5 (5.0%)          | 13 (13.0%)        | 0.17 (0.05, 0.63) | 0.13 for interaction  |
| Non-smoker                 | 56 (6.5%)   | 20 (4.6%)         | 36 (8.3%)         | 0.52 (0.29, 0.92) |                       |
| Implant Exchange – Overall | 169 (15.7%) | 90 (16.6%)        | 79 (14.7%)        | 1.07 (0.78, 1.46) | 0.67                  |
| Smoker                     | 30 (14.9%)  | 12 (11.9%)        | 18 (18.0%)        | 0.49 (0.23, 1.08) | 0.03 for interaction  |
| Non-smoker                 | 139 (16.1%) | 78 (18.1%)        | 61 (14.1%)        | 1.26 (0.89, 1.79) |                       |
| Avascular Necrosis         | 78 (7.2%)   | 50 (9.2%)         | 28 (5.2%)         | 1.78 (1.09, 2.91) | 0.02                  |
| Smoker                     | 8 (4.0%)    | 4 (4.0%)          | 4 (4.0%)          | 0.69 (0.15, 3.15) | 0.14 for interaction  |
| Non-smoker                 | 70 (8.1%)   | 46 (10.7%)        | 24 (5.6%)         | 2.01 (1.18, 3.41) |                       |
| Nonunion                   | 66 (6.1%)   | 33 (6.1%)         | 33 (6.2%)         | 0.86 (0.52, 1.41) | 0.55                  |
| Smoker                     | 16 (8.0%)   | 5 (5.0%)          | 11 (11.0%)        | 0.31 (0.10, 0.99) | 0.049 for interaction |
| Non-smoker                 | 50 (5.8%)   | 28 (6.5%)         | 22 (5.1%)         | 1.14 (0.64, 2.03) |                       |
| Mortality                  | 156 (14.5%) | 73 (13.5%)        | 83 (15.5%)        | 0.81 (0.58, 1.12) | 0.20                  |
| Smoker                     | 33 (16.4%)  | 14 (13.9%)        | 19 (19%)          | 0.65 (0.31, 1.37) | 0.47 for interaction  |
| Non-smoker                 | 111 (12.9%) | 53 (12.3%)        | 58 (13.4%)        | 0.89 (0.61, 1.29) |                       |
